# Supplementary material for: Brain stimulation techniques as novel treatment options for insomnia: A systematic review
Source: PubMed Central journal article supplement (PMC10909439; doi:10.1111/jsr.13927), 2023-05-18
Supplement: JSR-32-e13927-s002.pdf [file JSR-32-e13927-s002.pdf]

## Risk of Bias Assessment

|                       |                  | <u>D1</u> | <u>D2</u> | <u>D3</u> | <u>D4</u> | <u>D5</u> | <u>Overall</u> |                                                            |
|-----------------------|------------------|-----------|-----------|-----------|-----------|-----------|----------------|------------------------------------------------------------|
| Jiang et al. 2013     | rTMS             | +         | !         | +         | +         | -         | -              | + Low risk                                                 |
| Huang et al. 2018     | rTMS             | +         | +         | +         | !         | +         | !              | ! Some concerns                                            |
| Zhang et al. 2018     | rTMS             | +         | !         | +         | -         | !         | -              | - High risk                                                |
| Zhang et al. 2022     | rTMS             | +         | !         | +         | +         | -         | -              |                                                            |
| Li et al. 2022        | rTMS             | +         | !         | +         | !         | -         | -              | D1 Randomisation process                                   |
| Lu et al. 2022        | rTMS             | +         | -         | +         | !         | -         | -              | D2 Deviations from the intended interventions              |
| Guo et al. 2023       | rTMS             | +         | !         | +         | !         | -         | -              | D3 Missing outcome data                                    |
| Zhang et al. 2023     | rTMS             | +         | !         | +         | !         | -         | -              | D4 Measurement of the outcome                              |
| Pu et al. 2023        | rTMS             | +         | -         | +         | !         | +         | -              | D5 Selection of the reported result                        |
| Saebipour et al. 2015 | toDCS            | !         | !         | +         | -         | -         | -              |                                                            |
| Frase et al. 2019     | tDCS             | +         | !         | +         | +         | +         | !              | rTMS: Repetitive transcranial magnetic stimulation         |
| Zhou et al. 2020      | tDCS             | +         | +         | +         | +         | !         | !              | tDCS: Transcranial direct current stimulation              |
| Wang et al. 2020      | tACS             | +         | +         | +         | +         | !         | !              | toDCS: Transcranial oscillatory direct current stimulation |
| Motamedi et al. 2022  | tACS             | +         | !         | !         | -         | -         | -              | tACS: Transcranial alternating current stimulation         |
| Roth et al. 2018      | Forehead cooling | +         | +         | +         | +         | +         | +              | taVNS: Transcutaneous auricular vagus nerve stimulation    |
| Jiao et al. 2020      | taVNS            | +         | +         | +         | +         | +         | +              |                                                            |
| Wu et al. 2022        | taVNS            | +         | +         | +         | +         | !         | !              |                                                            |
